# Supplementary material
Source: publisher figshare collection journal article supplement (https://gsajournals.figshare.com/ndownloader/files/26476880)
Supplement: Supplementary file 1 [file 26476880]

## Sheet: Legend
	Supplementary Table 4.
	List of the twenty-three KOs exhibiting altered period. The list includes KO number (NCU), period defect (hours) and additional information on whether the corresponding TF encoding gene has been reported as clock- or light-regulated, or affected by defined carbon sources.
TITLE	DEFINITION
Locus	Transcription Factor locus absent in the KO strain.
Period defect	Period alteration associated with the corresponding KO
Clock-controlled	Genes with reported rhythmic expression (peak of expression info when available)
Light-responsive	Genes with reported light-regulated expression
C-Source	Carbon source affecting the expression of the gene. The reference of col-26 implies that the differential expression of the gene under the Carbon source is reported to be dependent on col-26
*	KO strains validated by complementation. These KOs were further analyzed not necessarily because of showing the largest period defects, but mainly as they were of interest based on other ongoing studies

## Sheet: Table S4
Locus	Period defect	Clock-controlled	Light-responsive	C-Source
NCU00499*	-0.91 h	Rhythmic
NCU01154	-0.71 h	Rhythmic-Morning Peak	Yes	Maltose (col-26)/Amylose (col-26)
NCU01238*	-1.17 h
NCU01243	+0.50 h	Rhythmic	Yes
NCU01640	-0.51 h	Rhythmic	Yes	Amylose (col-26)
NCU02307	-0.51 h	Rhythmic-Evening Peak	Yes	Hemicellulose/Starch (col-26)
NCU02413	-0.78 h
NCU03417	+0.52 h
NCU03643	-0.66 h	Rhythmic	Yes	Amylose (col-26)
NCU04001	+0.87 h		Yes	Amylose (col-26)
NCU04773	-0.56 h
NCU06140	-0.92 h		Yes	Amylose (col-26)
NCU06145	-1.88 h		Yes	Maltose
NCU06213	-0.85 h	Rhythmic-Evening Peak
NCU07675	-0.67 h			Amylose (col-26)
NCU08042	-0.64 h			Cellulose
NCU08443	-0.63 h	Rhythmic-Morning Peak
NCU08652	-0.67 h			Maltose
NCU08848	-1.04 h
NCU08999*	+1.38 h
NCU09252	-0.71 h	Rhythmic		Starch
NCU09615	-0.63 h	Rhythmic-Morning peak	Yes	Starch
NCU10006*	-0.83 h
